# Supplementary material for: Inhibition of ANO1/TMEM16A induces apoptosis in human prostate carcinoma cells by activating TNF-α signaling
Source: PubMed Central journal article supplement (PMC5999606; doi:10.1038/s41419-018-0735-2), 2018-06-13
Supplement: 41419_2018_735_MOESM1_ESM.pdf [file 41419_2018_735_MOESM1_ESM.pdf]

## Supplementary information

### Inhibition of ANO1/TMEM16A induces apoptosis in human prostate carcinoma cells by activating TNF- $\alpha$ signaling

Yan Song<sup>1</sup>, Jian Gao<sup>1</sup>, Lizhao Guan<sup>1</sup>, Xiaoling Chen<sup>1</sup>, Jianjun Gao<sup>2</sup> and KeWei Wang<sup>1,2¶</sup>

<sup>1</sup>Department of Molecular and Cellular Pharmacology, State Key Laboratory of Natural and Biomimetic Drugs, Peking University School of Pharmaceutical Sciences, Beijing 100191; and  
<sup>2</sup>Department of Pharmacology, Qingdao University School of Pharmacy, Qingdao 266021, China

¶To whom correspondence should be addressed:

KWW (wangkw@bjmu.edu.cn or wangkw@qdu.edu.cn)

Tel: (8610) 82805065

Fax: (8610) 82805065

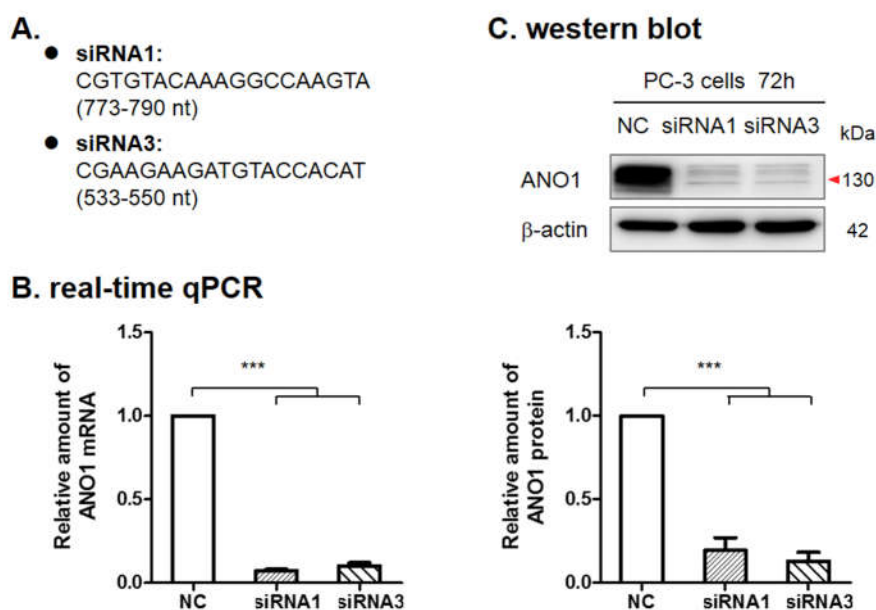

**Figure S1. Identification of ANO1 silencing by siRNAs transfection in PC-3 cells.**

(A). Two siRNA targeting sites in human ANO1/TMEM16A gene (GenBankNM\_018043).

(B). PC-3 cells were transfected by ANO1-siRNAs for 72 h. Relative amount of ANO1 mRNA expression was examined using qPCR and presented after being normalized to  $\beta$ -actin (means  $\pm$  SEM;  $n = 7$  independent experiments). \*\*\*  $p < 0.001$  are for statistical comparisons.

(C). Top panel, representative images of ANO1 expression by western blot. Bottom panel, quantitative analysis of ANO1 protein expression. Data are expressed as means  $\pm$  SEM ( $n = 5$  independent experiments). \*\*\*  $p < 0.001$  are for statistical comparisons.

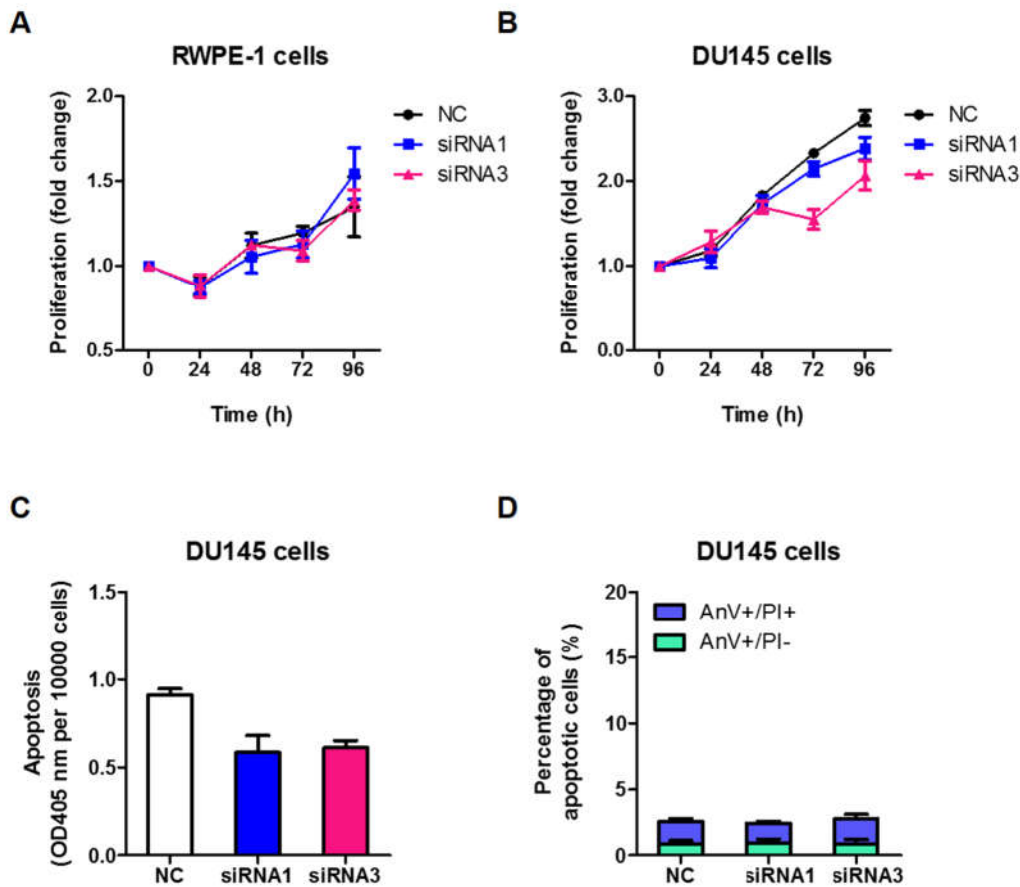

**Figure S2. Effect of ANO1 inhibition on cell growth and apoptosis in prostate cancer cells.**

(A&B). Silencing of endogenous ANO1 does not significantly decrease cell growth in RWPE-1 or DU145 cells. Cells were transfected with ANO1-siRNAs or NCsi (negative control). Line graph showing relative of viable cell number of RWPE-1 cells (A) or DU145 cells (B) after ANO1 knockdown (means  $\pm$  SEM,  $n = 6$ ). Viable cell number was accessed by CCK-8 assay.

(C&D). No effect on apoptosis in DU145 cells by ANO1 silencing. (C) Bar graph showing apoptosis accessed by Cell Death Detection ELISA<sup>PLUS</sup> Kit (means  $\pm$  SEM,  $n = 4$ ). Parallel plates with the same treatment were used for cell counting. (D) Apoptosis was assessed by Annexin V-FITC/PI Apoptosis Detection Kit using a Flow Cytometer. Bar graph showing percentage of apoptotic cells after knockdown of ANO1 for 72 h (means  $\pm$  SEM,  $n = 3$ ).

### A. Vector

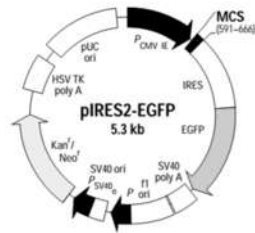

### C. western blot

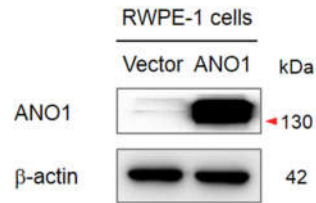

### B. real-time qPCR

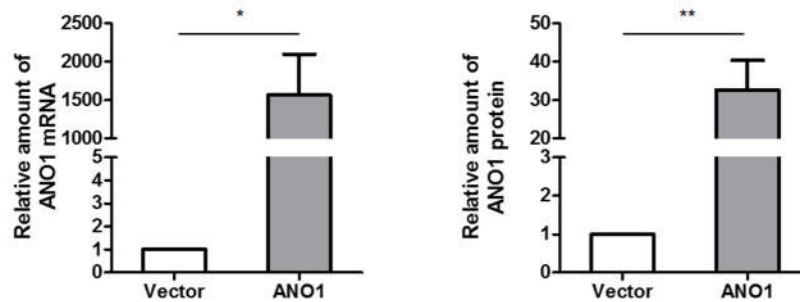

## Figure S3. Identification of ANO1 stable overexpression in RWPE-1 cells.

(A). The vector pIRES2-EGFP was used to construct ANO1 plasmids.

(B). Relative amount of ANO1 mRNA expression was examined using qPCR and presented after being normalized to  $\beta$ -actin (means  $\pm$  SEM;  $n = 3$  independent experiments). \*  $p < 0.05$  are for statistical comparisons.

(C). Top panel, representative images of ANO1 expression by western blot analysis. Bottom panel, quantitative analysis of ANO1 protein expression. Data are expressed as means  $\pm$  SEM ( $n = 4$  independent experiments). \*\*  $p < 0.01$  are for statistical comparisons.

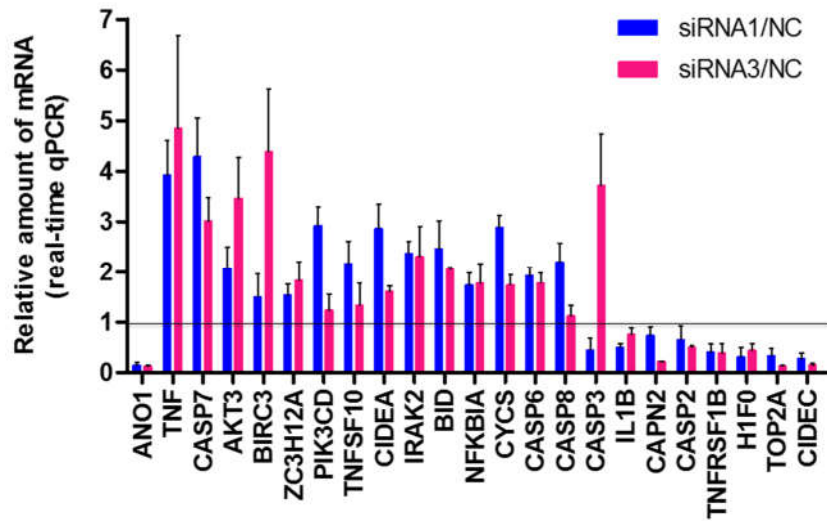

**Figure S4. Verification of apoptosis related gene expression in ANO1-RNAi treated PC-3 cell.** PC-3 cells were transfected by ANO1-siRNAs for 72 h. Relative amount of ANO1 mRNA expression was examined using qPCR. Data are presented after being normalized to  $\beta$ -actin (means  $\pm$  SEM;  $n$  = 3 independent experiments).

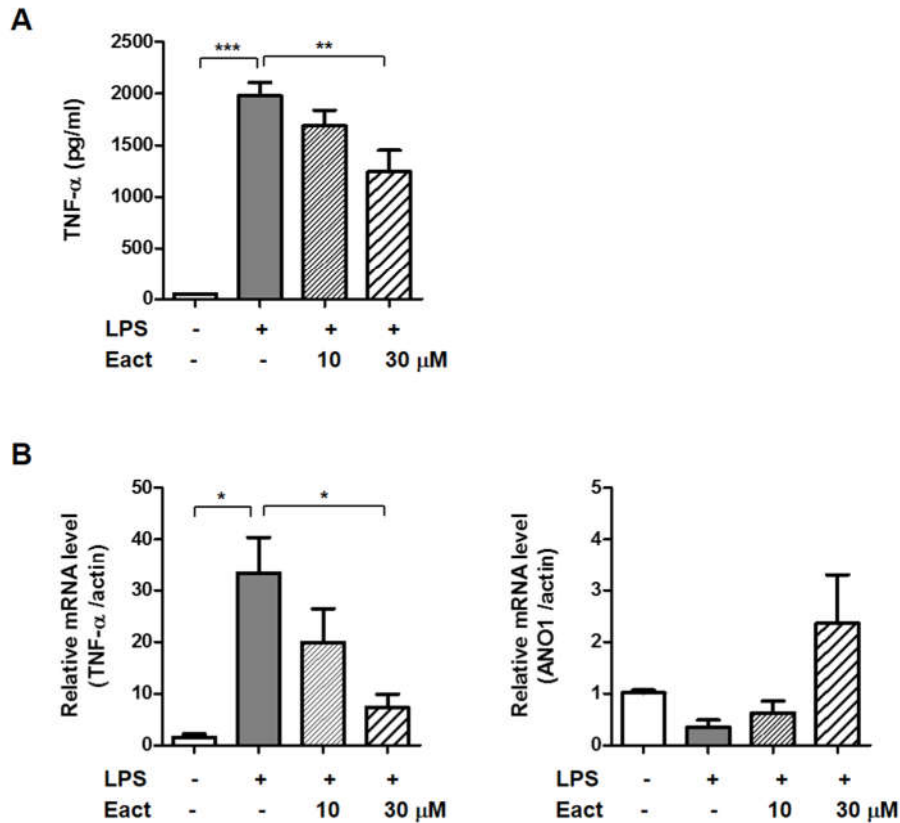

**Figure S5. Inhibition of LPS-induced TNF- $\alpha$  production in primary mouse macrophages by pharmacological activation of ANO1.**

(A) Primary mouse macrophages were cultured in 24-well plate (1,000,000 cells per well). Cells were pre-treated with ANO1 activator, Eact (10, 30  $\mu$ M) for 24 h, followed by stimulation with 0.1  $\mu$ g/mL LPS to induce TNF- $\alpha$  release. After 24 h of LPS stimulation, levels of TNF- $\alpha$  in culture supernatants were measured by ELISA. The data are presented as means  $\pm$  SEM ( $n = 9$ ). \*\*  $p < 0.01$ , \*\*\*  $p < 0.001$ . Activation of ANO1 by Eact inhibits LPS-induced TNF- $\alpha$  production in a dose-dependent manner.

(B) The relative mRNA expression of TNF- $\alpha$  and ANO1 was examined using qPCR and data are presented after being normalized to  $\beta$ -actin (means  $\pm$  SEM;  $n = 4$ ). \*  $p < 0.05$ . LPS up-regulated the mRNA expression of TNF- $\alpha$ , and down-regulated the mRNA expression of ANO1. Eact dose-dependently inhibited the expression of TNF- $\alpha$  induced by LPS-stimulation in primary mouse macrophages.

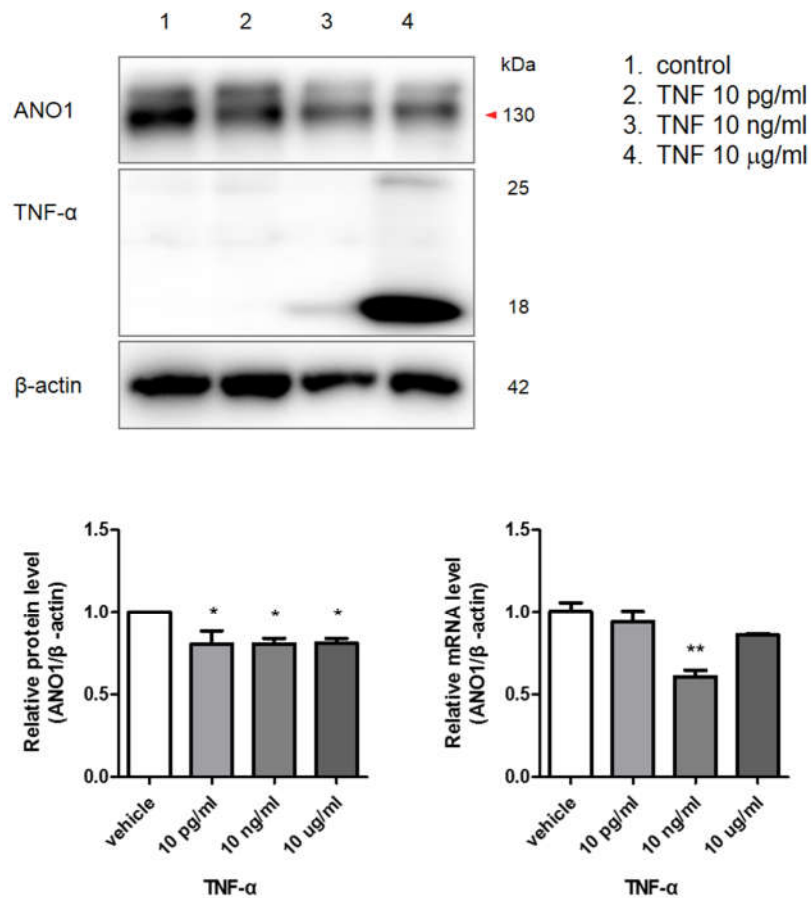

**Figure S6. TNF- $\alpha$  down-regulates ANO1 expression in PC-3 cells.**

PC-3 cells were cultured in 6-well plate (100,000 cells per well) and were treated with different concentrations of human recombinant TNF- $\alpha$  (10 pg/ml, 10 ng/ml, and 10  $\mu$ g/ml). After 24 h of treatment, the relative protein and mRNA expression of ANO1 was measured using western blot and qPCR. The data are presented after being normalized to  $\beta$ -actin (means  $\pm$  SEM;  $n = 4$ ; \*  $p < 0.05$ , \*\*  $p < 0.01$ ). Human recombinant TNF- $\alpha$  decreases ANO1 expression in PC-3 cells.

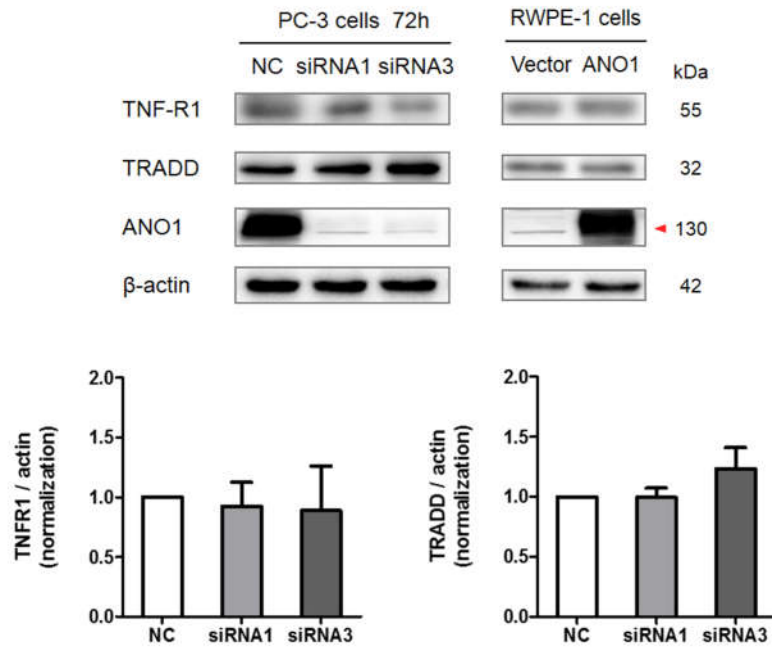

**Figure S7. Verification of TNF-R1 and TRADD expression.**

Immunoblots of lysates from prostate cells as described. Data are expressed as means  $\pm$  SEM. There was no significant change observed in TNFR1 ( $n = 3$ ) and TRADD ( $n = 5$ ) expression in either PC-3 cells or RWPE-1 cells.

**Table S1. Differential expression of apoptosis related genes in ANO1-RNAi treated PC-3 cells by digital gene expression profiling.**

| Symbol   | Description                                                            | log <sub>2</sub> Ratio<br>(siRNA1/NC) | log <sub>2</sub> Ratio<br>(siRNA3/NC) |
|----------|------------------------------------------------------------------------|---------------------------------------|---------------------------------------|
| CASP7    | caspase 7                                                              | 1.461                                 | 1.145                                 |
| AKT3     | AKT serine/threonine kinase 3                                          | 0.582                                 | 1.591                                 |
| BIRC3    | baculoviral IAP repeat containing 3                                    | 0.071                                 | 2.063                                 |
| ZC3H12A  | zinc finger CCCH-type containing 12A                                   | 0.798                                 | 1.233                                 |
| PIK3CD   | phosphatidylinositol-4,5-bisphosphate 3-kinase catalytic subunit delta | 1.345                                 | 0.681                                 |
| TNFSF10  | tumor necrosis factor superfamily member 10, TRAIL                     | 1.183                                 | 0.826                                 |
| CIDEA    | cell death-inducing DFFA-like effector a                               | 0.981                                 | 0.978                                 |
| IRAK2    | interleukin 1 receptor associated kinase 2                             | 0.678                                 | 1.253                                 |
| BID      | BH3 interacting domain death agonist                                   | 1.327                                 | 0.594                                 |
| NFKBIA   | NFKB inhibitor alpha                                                   | 0.605                                 | 1.304                                 |
| CYCS     | cytochrome c, somatic                                                  | 1.248                                 | 0.558                                 |
| CASP6    | caspase-6                                                              | 0.883                                 | 0.684                                 |
| CASP8    | caspase-8                                                              | 0.727                                 | 0.170                                 |
| CASP3    | caspase-3                                                              | -1.540                                | 1.143                                 |
| IL1B     | interleukin 1 beta                                                     | -1.344                                | -0.117                                |
| CAPN2    | calpain 2                                                              | -0.423                                | -1.533                                |
| CASP2    | caspase-2                                                              | -1.234                                | -0.823                                |
| TNFRSF1B | tumor necrosis factor receptor superfamily member 1B, TNFR2            | -0.756                                | -1.759                                |
| H1F0     | H1 histone family, member 0                                            | -2.815                                | -1.985                                |
| TOP2A    | topoisomerase (DNA) II alpha 170kDa                                    | -2.325                                | -2.960                                |
| CIDEC    | cell death inducing DFFA like effector c                               | -1.926                                | -3.929                                |

log<sub>2</sub>Ratio > 0 means up-regulation, log<sub>2</sub>Ratio < 0 means down-regulation



**Table S2. Sequences of primers used for qPCR**

| Gene             | Forward (5'...3')       | Reverse (5'...3')       |
|------------------|-------------------------|-------------------------|
| h $\beta$ -actin | CATGTACGTTGCTATCCAGGC   | CTCCTTAATGTCACGCACGAT   |
| hANO1            | GAGCCAAAGACATCGGAATCTG  | TGAAGGAGATCACGAAGGCAT   |
| hTNF- $\alpha$   | CATGTACGTTGCTATCCAGGC   | CCCTAAGCCCCCAATTCTCT    |
| hAKT3            | TGTGGATTTACCTTATCCCCTCA | GTTTGGCTTTGGTCGTTCTGT   |
| hBID             | ATGGACCGTAGCATCCCTCC    | GTAGGTGCGTAGGTTCTGGT    |
| hBIRC3           | AAGCTACCTCTCAGCCTACTTT  | CCACTGTTTTCTGTACCCGGA   |
| hCAPN2           | GTTCTGGCAATACGGCGAGT    | CTTCGGCTGAATGCACAAAGA   |
| hCASP2           | AGCTGTTGTTGAGCGAATTGT   | AGCAAGTTGAGGAGTTCCACA   |
| hCASP3           | CATGGAAGCGAATCAATGGACT  | CTGTACCAGACCGAGATGTCA   |
| hCASP6           | ATGGCGAAGGCAATCACATTT   | GTGCTGGTTTCCCCGACAT     |
| hCASP7           | CGGTCCTCGTTTGTACCGTC    | CGCCCATACCTGTCACTTTATCA |
| hCASP8           | TTTCTGCCTACAGGGTCATGC   | GCTGCTTCTCTCTTTGCTGAA   |
| hCIDEA           | TTATGGGATCACAGACTAAGCGA | TGCTCCTGTCATGGTTGGAGA   |
| hCIDEA           | AAGTCCCTTAGCCTTCTCTACC  | CCTTCCTCACGCTTCGATCC    |
| hCYCS            | CTTTGGGCGGAAGACAGGTC    | TTATTGGCGGCTGTGTAAGAG   |
| hH1F0            | CGCGCCAGTCCATTCAGAA     | ACAACCTGATCTGCGAGTCAG   |
| hIL1B            | ATGATGGCTTATTACAGTGGCAA | GTCGGAGATTCGTAGCTGGA    |
| hIRAK2           | GAAATCAGGTGTCCATTCCAG   | TGGGGAGGTCGCTTCTCAA     |
| hNFKBIA          | CTCCGAGACTTTCGAGGAAATAC | GCCATTGTAGTTGGTAGCCTTCA |
| hPIK3CD          | AAGGAGGAGAATCAGAGCGTT   | GAAGAGCGGCTCATACTGGG    |
| hTNFRSF1B        | CGGGCCAACATGCAAAAGTC    | CAGATGCGGTTCTGTTCCC     |
| hTNFSF10         | GCTCGTTGGTAAAGTACACGTA  | TGCGTGCTGATCGTGATCTTC   |
| hTOP2A           | ACCATTGCAGCCTGTAAATGA   | GGGCGGAGCAAAATATGTTCC   |
| hZC3H12A         | GGCAGTGAAGTGGTTTCTGGA   | GATCCCGTCAGACTCGTAGG    |

**Table S3. Sequences of ANO1 shRNA**

| Gene             | Forward (5'...3')                                                  | Reverse (5'...3')                                                  |
|------------------|--------------------------------------------------------------------|--------------------------------------------------------------------|
| ANO1<br>shRNA1   | CCGGGACGTGTACAAAGGCC<br>AAGTACTCGAGTACTTGGCC<br>TTTGTACACGTCTTTTTG | AATTCAAAAAGACGTGTACA<br>AGGCCAAGTACTCGAGTACT<br>ATGGCCTTTGTACACGTC |
| control<br>shRNA | CCGGGACGAGTGGTCTAGTT<br>GAGAACTCGAGTTCTCAACT<br>AGACCACTCGTCTTTTTG | AATTCAAAAAGACGAGTGGT<br>CTAGTTGAGAACTCGAGTTC<br>TCAACTAGACCACTCGTC |
